# Supplementary material for: The Influence of a Prolonged Meteorological Drought on the Catchment Water Storage Capacity: A Hydrological Model Perspective
Source: Copernicus journal article supplement (doi:10.5194/hess-2019-692), 2020-02-18
Supplement: Supplementary file [file hess-2019-692-AC1-supplement.zip]

Table 3. The direction of the shifts in the CWSC due to the long-term meteorological drought for the catchments in southeastern Australia.

| Magnitude                                                                                                                  | Change direction                                              | Percentage (Number of catchments) |
|----------------------------------------------------------------------------------------------------------------------------|---------------------------------------------------------------|-----------------------------------|
| Significant change                                                                                                         | Downward (Smaller CWSC than the previous estimation suggests) | 8.3% (12)                         |
|                                                                                                                            | Upward (Larger CWSC than the previous estimation suggests)    | 27.6% (40)                        |
| Non-significant change                                                                                                     | Slight increase                                               | 12.4% (18)                        |
|                                                                                                                            | Slight decrease                                               | 9.0% (13)                         |
| Dissatisfy the criteria of the minimum NSE performance, the maximum performance degradation and the robustness requirement |                                                               | 42.8% (62)                        |
| All (catchments with a sustained meteorological drought)                                                                   |                                                               | 100% (145)                        |

Table S1. Catchments with the long-term meteorological droughts.

| FID | Station ID | Drought start | Drought end | drought anomaly | Complete |
|-----|------------|---------------|-------------|-----------------|----------|
| 1   | 143107     | 2000          | 2007        | -19.67%         | 97.03%   |
| 2   | 145010     | 1993          | 2009        | -10.41%         | 97.71%   |
| 3   | 146095     | 1991          | 1998        | -11.24%         | 96.91%   |
| 4   | 201001     | 1991          | 1998        | -9.64%          | 97.44%   |
| 5   | 203005     | 1991          | 2007        | -11.66%         | 95.62%   |
| 6   | 203010     | 1991          | 2007        | -11.84%         | 96.41%   |
| 7   | 204017     | 1991          | 2007        | -9.95%          | 97.77%   |
| 8   | 204025     | 1991          | 2007        | -12.37%         | 95.47%   |
| 9   | 204037     | 1991          | 2005        | -9.15%          | 97.17%   |
| 10  | 204039     | 2000          | 2009        | -13.66%         | 82.96%   |
| 11  | 204041     | 1991          | 2006        | -12.39%         | 96.80%   |
| 12  | 204906     | 1991          | 2007        | -12.71%         | 97.12%   |
| 13  | 208004     | 1991          | 1997        | -12.47%         | 96.94%   |
| 14  | 208005     | 1991          | 1998        | -10.85%         | 97.13%   |
| 15  | 208019     | 1991          | 1998        | -13.11%         | 80.26%   |
| 16  | 210016     | 2001          | 2007        | -10.13%         | 88.07%   |
| 17  | 210031     | 2001          | 2007        | -9.50%          | 94.67%   |
| 18  | 210040     | 2001          | 2007        | -11.87%         | 96.51%   |
| 19  | 210052     | 2001          | 2007        | -8.63%          | 83.18%   |
| 20  | 210093     | 2001          | 2007        | -12.36%         | 86.06%   |
| 21  | 211009     | 1993          | 2006        | -15.08%         | 96.97%   |
| 22  | 211014     | 1993          | 2006        | -14.82%         | 95.30%   |
| 23  | 212040     | 2000          | 2009        | -12.27%         | 84.80%   |
| 24  | 215002     | 2000          | 2009        | -16.58%         | 89.43%   |
| 25  | 215008     | 1999          | 2009        | -14.45%         | 96.36%   |
| 26  | 217002     | 2000          | 2009        | -19.67%         | 97.20%   |

| FID | Station ID | Drought start | Drought end | drought anomaly | Complete |
|-----|------------|---------------|-------------|-----------------|----------|
| 27  | 218001     | 2002          | 2009        | -16.00%         | 98.32%   |
| 28  | 218005     | 2002          | 2009        | -16.37%         | 97.73%   |
| 29  | 218007     | 1996          | 2009        | -11.64%         | 97.79%   |
| 30  | 218008     | 2002          | 2009        | -16.56%         | 93.60%   |
| 31  | 219003     | 1998          | 2009        | -13.85%         | 97.36%   |
| 32  | 219006     | 1998          | 2009        | -15.14%         | 98.27%   |
| 33  | 219017     | 2002          | 2009        | -21.36%         | 97.78%   |
| 34  | 219022     | 1998          | 2009        | -15.71%         | 97.35%   |
| 35  | 220003     | 1998          | 2009        | -12.20%         | 97.78%   |
| 36  | 220004     | 1996          | 2009        | -12.28%         | 97.03%   |
| 37  | 221010     | 1996          | 2009        | -9.23%          | 82.23%   |
| 38  | 222007     | 2002          | 2009        | -13.72%         | 98.28%   |
| 39  | 222016     | 2002          | 2009        | -12.26%         | 96.52%   |
| 40  | 222017     | 1996          | 2009        | -9.98%          | 89.46%   |
| 41  | 222202     | 2002          | 2009        | -10.32%         | 95.67%   |
| 42  | 222206     | 2002          | 2009        | -10.76%         | 91.82%   |
| 43  | 222213     | 2002          | 2009        | -12.23%         | 91.39%   |
| 44  | 222217     | 2002          | 2009        | -10.15%         | 98.81%   |
| 45  | 223202     | 2002          | 2009        | -13.78%         | 91.54%   |
| 46  | 224201     | 2002          | 2009        | -13.64%         | 98.46%   |
| 47  | 224206     | 2002          | 2009        | -13.44%         | 91.88%   |
| 48  | 224213     | 2002          | 2009        | -15.64%         | 95.80%   |
| 49  | 224214     | 2002          | 2009        | -14.36%         | 99.51%   |
| 50  | 225218     | 2002          | 2009        | -9.03%          | 100.00%  |
| 51  | 225219     | 1997          | 2009        | -11.70%         | 91.47%   |
| 52  | 226204     | 1997          | 2009        | -10.91%         | 96.30%   |
| 53  | 226209     | 1999          | 2009        | -11.47%         | 100.00%  |
| 54  | 226220     | 1997          | 2009        | -10.43%         | 85.57%   |
| 55  | 226226     | 1999          | 2009        | -8.73%          | 99.95%   |
| 56  | 226402     | 1999          | 2009        | -11.51%         | 100.00%  |
| 57  | 227202     | 1997          | 2009        | -9.88%          | 95.68%   |
| 58  | 227219     | 1997          | 2009        | -10.50%         | 92.34%   |
| 59  | 227227     | 1997          | 2009        | -10.56%         | 92.09%   |
| 60  | 227231     | 1997          | 2009        | -10.34%         | 92.30%   |
| 61  | 227236     | 1997          | 2009        | -9.31%          | 83.12%   |
| 62  | 228209     | 1999          | 2009        | -10.75%         | 80.24%   |
| 63  | 229661     | 1997          | 2009        | -11.23%         | 82.54%   |
| 64  | 231225     | 1997          | 2009        | -13.26%         | 100.00%  |
| 65  | 233223     | 1997          | 2009        | -11.90%         | 92.68%   |
| 66  | 234200     | 1997          | 2009        | -10.64%         | 84.79%   |
| 67  | 234201     | 1997          | 2009        | -10.33%         | 94.83%   |
| 68  | 234203     | 1997          | 2009        | -9.19%          | 96.24%   |
| 69  | 235203     | 1997          | 2009        | -6.89%          | 91.44%   |

| FID | Station ID | Drought start | Drought end | drought anomaly | Complete |
|-----|------------|---------------|-------------|-----------------|----------|
| 70  | 236205     | 1994          | 2009        | -6.52%          | 92.62%   |
| 71  | 236212     | 1997          | 2009        | -7.22%          | 91.93%   |
| 72  | 237202     | 1993          | 2009        | -6.36%          | 92.05%   |
| 73  | 237205     | 1993          | 2009        | -6.20%          | 92.21%   |
| 74  | 237206     | 1993          | 2009        | -6.05%          | 96.41%   |
| 75  | 237207     | 1993          | 2009        | -6.16%          | 92.04%   |
| 76  | 238204     | 1997          | 2009        | -9.65%          | 89.94%   |
| 77  | 238229     | 1997          | 2009        | -7.83%          | 92.24%   |
| 78  | 238231     | 1997          | 2009        | -9.63%          | 82.82%   |
| 79  | 238235     | 1993          | 2009        | -5.95%          | 92.05%   |
| 80  | 239523     | 1993          | 1999        | -7.96%          | 99.72%   |
| 81  | 239531     | 1997          | 2009        | -8.64%          | 98.30%   |
| 82  | 401012     | 2002          | 2009        | -14.08%         | 99.13%   |
| 83  | 401013     | 2001          | 2009        | -17.54%         | 98.17%   |
| 84  | 401203     | 2001          | 2009        | -15.90%         | 99.86%   |
| 85  | 401208     | 2001          | 2009        | -17.18%         | 99.98%   |
| 86  | 401212     | 2002          | 2009        | -15.96%         | 99.87%   |
| 87  | 401217     | 2002          | 2009        | -15.21%         | 99.87%   |
| 88  | 405205     | 1997          | 2009        | -13.26%         | 99.99%   |
| 89  | 405209     | 1997          | 2009        | -13.07%         | 99.95%   |
| 90  | 405215     | 1999          | 2009        | -12.49%         | 99.84%   |
| 91  | 405217     | 1997          | 2009        | -13.27%         | 100.00%  |
| 92  | 405219     | 1997          | 2009        | -11.16%         | 99.87%   |
| 93  | 405227     | 1997          | 2009        | -11.61%         | 99.86%   |
| 94  | 405229     | 1997          | 2009        | -14.97%         | 99.15%   |
| 95  | 405230     | 1997          | 2009        | -14.79%         | 100.00%  |
| 96  | 405231     | 2001          | 2009        | -16.24%         | 99.87%   |
| 97  | 405241     | 1997          | 2009        | -13.62%         | 100.00%  |
| 98  | 405245     | 1997          | 2009        | -15.99%         | 99.78%   |
| 99  | 405263     | 1997          | 2009        | -10.61%         | 99.87%   |
| 100 | 405264     | 1997          | 2009        | -11.14%         | 99.87%   |
| 101 | 406214     | 1997          | 2009        | -14.23%         | 99.86%   |
| 102 | 406224     | 1997          | 2009        | -14.08%         | 100.00%  |
| 103 | 407214     | 2001          | 2009        | -16.19%         | 99.40%   |
| 104 | 407215     | 2001          | 2009        | -17.73%         | 99.47%   |
| 105 | 407220     | 2001          | 2009        | -18.39%         | 98.77%   |
| 106 | 407230     | 2001          | 2009        | -17.92%         | 99.92%   |
| 107 | 408200     | 2000          | 2009        | -18.03%         | 99.92%   |
| 108 | 408202     | 2001          | 2009        | -14.66%         | 99.54%   |
| 109 | 410024     | 2001          | 2009        | -19.20%         | 98.01%   |
| 110 | 410026     | 2000          | 2009        | -13.19%         | 97.94%   |
| 111 | 410033     | 2001          | 2009        | -12.11%         | 97.38%   |
| 112 | 410038     | 2001          | 2009        | -20.49%         | 95.84%   |

| FID | Station ID | Drought start | Drought end | drought anomaly | Complete |
|-----|------------|---------------|-------------|-----------------|----------|
| 113 | 410044     | 2001          | 2009        | -20.21%         | 94.64%   |
| 114 | 410047     | 2001          | 2009        | -17.73%         | 94.48%   |
| 115 | 410057     | 2001          | 2009        | -19.32%         | 98.13%   |
| 116 | 410061     | 2001          | 2009        | -19.12%         | 97.02%   |
| 117 | 410062     | 2002          | 2009        | -14.90%         | 95.29%   |
| 118 | 410088     | 2001          | 2009        | -17.90%         | 98.27%   |
| 119 | 410091     | 2001          | 2009        | -17.43%         | 82.48%   |
| 120 | 410097     | 2001          | 2009        | -17.25%         | 87.34%   |
| 121 | 410107     | 2001          | 2009        | -19.39%         | 87.74%   |
| 122 | 410141     | 2000          | 2009        | -14.70%         | 80.53%   |
| 123 | 410705     | 2000          | 2009        | -14.97%         | 100.00%  |
| 124 | 410713     | 2001          | 2009        | -19.65%         | 98.40%   |
| 125 | 410730     | 2000          | 2009        | -15.05%         | 99.75%   |
| 126 | 410731     | 2000          | 2009        | -14.82%         | 97.75%   |
| 127 | 410734     | 2000          | 2009        | -14.43%         | 99.43%   |
| 128 | 412028     | 2001          | 2009        | -16.98%         | 95.86%   |
| 129 | 412050     | 2001          | 2009        | -12.92%         | 88.11%   |
| 130 | 412066     | 2001          | 2009        | -15.27%         | 96.69%   |
| 131 | 412080     | 2001          | 2009        | -14.72%         | 81.02%   |
| 132 | 415201     | 2000          | 2009        | -13.22%         | 99.86%   |
| 133 | 415207     | 2001          | 2009        | -15.09%         | 99.54%   |
| 134 | 415220     | 2000          | 2009        | -18.01%         | 99.29%   |
| 135 | 415226     | 2000          | 2008        | -16.44%         | 99.40%   |
| 136 | 415237     | 1997          | 2009        | -10.91%         | 97.17%   |
| 137 | 415238     | 2000          | 2009        | -17.31%         | 97.51%   |
| 138 | 418027     | 2000          | 2009        | -7.76%          | 95.20%   |
| 139 | 419032     | 2001          | 2009        | -10.40%         | 91.78%   |
| 140 | 419035     | 1991          | 1997        | -8.99%          | 80.84%   |
| 141 | 420003     | 2001          | 2007        | -17.20%         | 95.01%   |
| 142 | 420017     | 2001          | 2007        | -15.46%         | 86.20%   |
| 143 | 421042     | 2001          | 2007        | -12.01%         | 97.50%   |
| 144 | 421055     | 2001          | 2007        | -17.33%         | 80.79%   |
| 145 | 421076     | 2001          | 2009        | -14.83%         | 80.21%   |
